# Supplementary material for: Application of Peroxidase-Mimic Mn2BPMP Boosted by ADP to Enzyme Cascade Assay for Glucose and Cholesterol
Source: MDPI journal article supplement (doi:10.3390/chemosensors10020089), 2022-02-21
Supplement: s1 [file s1]

Archive with 1 entries (1 files):
- chemosensors-1531169-supplementary.pdf
