# Supplementary material for: Application of Peroxidase-Mimic Mn2BPMP Boosted by ADP to Enzyme Cascade Assay for Glucose and Cholesterol
Source: MDPI journal article supplement (doi:10.3390/chemosensors10020089), 2022-02-21
Supplement: s1 [file s1 › chemosensors-1531169-supplementary.pdf]

# Application of Peroxidase-Mimic Mn<sub>2</sub>BPMP Boosted by ADP to Enzyme Cascade Assay for Glucose and Cholesterol

Namgeol Lee <sup>†</sup>, Soyeon Yoo <sup>†</sup>, Youngkeun Lee and Min Su Han <sup>\*</sup>

Department of Chemistry, Gwangju Institute of Science and Technology (GIST), Gwangju 61005, Korea; namgeollee@gm.gist.ac.kr (N.L.); Yoosoyeon@gm.gist.ac.kr (S.Y.); lyk1130@gmail.com (Y.L.)

<sup>\*</sup> Correspondence: happyhan@gist.ac.kr (M.S.H.); Tel.: +82-62-715-2848

<sup>†</sup> These authors contributed equally to this work.

## Experimental section

### Synthesis of 2,6-bis(chloromethyl)-4-methylphenol

2,6-Bis(chloromethyl)-4-methylphenol was synthesized following the procedure previously described.<sup>1</sup> Briefly, 2,6-bis(hydroxymethyl)-*p*-cresol (2.5 g, 15 mmol) in DCM (30 mL) was added to thionyl chloride (10 mL, 140 mmol). After stirring for 12 h, the yellow mixture was washed with water and brine. The organic layer was dried with anhydrous sodium sulfate and concentrated under the reduced pressure to give a white solid. Yield 2.8 g (92%). <sup>1</sup>H-NMR (400 MHz, CHLOROFORM-D):  $\delta$  7.09 (s, 2H), 5.52 (s, 1H), 4.66 (s, 4H), and 2.29 (s, 3H).

### Synthesis of 2,6-bis[[bis(2-pyridylmethyl)amino]methyl]-4-methylphenol (H-BPMP)

H-BPMP was synthesized following the procedure previously described.<sup>1</sup> Briefly, 2,6-bis(chloromethyl)-4-methylphenol (2.8 g, 14 mmol) was dissolved in 30 mL of THF in an ice bath. Then, a solution of 2,2'-dipicolylamine (4.9 mL, 27 mmol) and triethylamine (11.6 mL, 55 mmol) in 30 mL of THF was added dropwise. After stirring for 5 days at room temperature, the mixture was filtered and concentrated under a reduced pressure. The mixture was dissolved in DCM then washed three times with brine. The organic layer was dried with anhydrous sodium sulfate and concentrated under reduced pressure. The mixture was hot filtered with diethyl ether to give a pale-yellow solid. Yield 6.2 g (85%). <sup>1</sup>H-NMR (400 MHz, CHLOROFORM-D):  $\delta$  10.77 (s, 1H), 8.51 (dt,  $J$  = 4.9, 0.9 Hz, 4H), 7.60 (td,  $J$  = 7.6, 1.8 Hz, 4H), 7.50 (d,  $J$  = 7.9 Hz, 4H), 7.14–7.09 (m, 4H), 6.99 (s, 2H), 3.86 (s, 8H), 3.77 (s, 4H), and 2.23 (s, 4H). <sup>13</sup>C-NMR (400 MHz, CHLOROFORM-D):  $\delta$  159.3, 153.6, 148.9, 136.5, 129.8, 127.3, 123.8, 122.9, 122.0, 59.8, 54.8, and 20.6. mp at 105–107 °C.

### Preparation of the Mn<sub>2</sub>BPMP

Mn<sub>2</sub>BPMP was prepared following the procedure previously described.<sup>1</sup> H-BPMP (0.42 g, 0.80 mmol), Mn(OAc)<sub>2</sub>·4H<sub>2</sub>O (0.39 g, 1.6 mmol), and NaOAc·3H<sub>2</sub>O (0.33g, 2.4 mmol) were dissolved in 18 mL of aqueous methanol solution (MeOH to H<sub>2</sub>O *v/v* = 8:1). After stirring for 30 min at room temperature, 1 mL of NaClO<sub>4</sub> solution (aq., 1.6 M) was added dropwise. After stirring for 1 h at room temperature, the mixture was cooled for a day at 0 °C. The mixture was filtered with an aqueous methanol solution (MeOH to H<sub>2</sub>O *v/v* = 16:3) to give a pale-yellow, needle-like crystal. Yield 0.54 g (67%). MS (ESI): [Mn<sub>2</sub>(BPMP)(OAc)<sub>2</sub>]<sup>+</sup> *m/z* calculated for C<sub>37</sub>H<sub>39</sub>Mn<sub>2</sub>N<sub>6</sub>O<sub>5</sub><sup>+</sup>: 757.1737; found: 757.1715.

### Limit of detection (LOD; S/N=3)

The LOD was calculated on the basis of the absorbance titration experiments. The absorbance spectra of the blank samples were measured 10 times to calculate the standard deviation of the blank measurement. In addition, to measure the slope of the calibration curve, the absorbance at 420 nm versus the concentration of the analyte was plotted. The LOD was calculated according to the following equation:  $\text{LOD} = 3\sigma/k$ , where  $\sigma$  is the standard deviation of the blank measurement and  $k$  is the slope of the calibration curve.

## Supplementary Results

### NMR and Mass Spectra

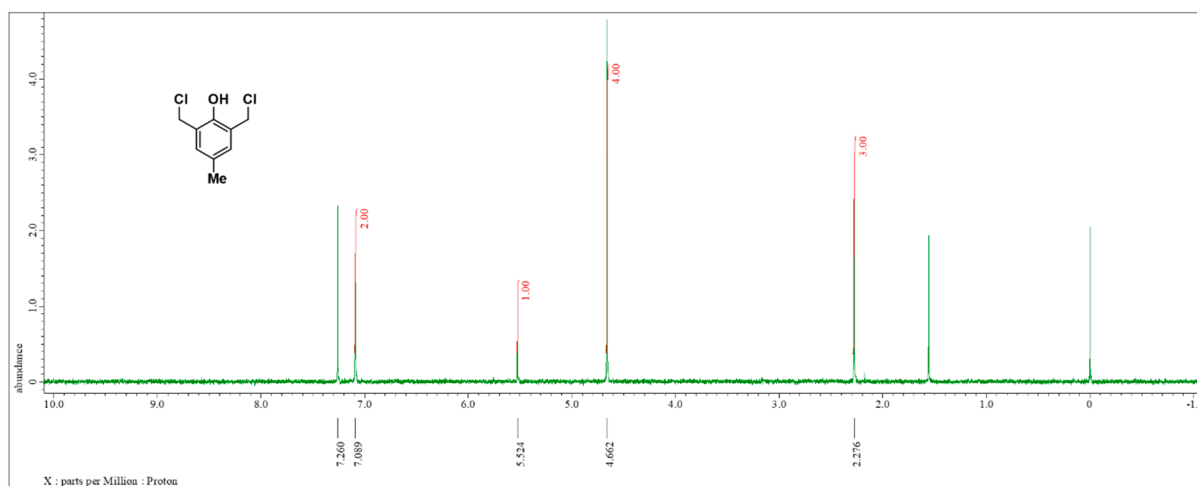

**Figure S1.** <sup>1</sup>H-NMR spectrum of 2,6-bis(chloromethyl)-4-methylphenol.

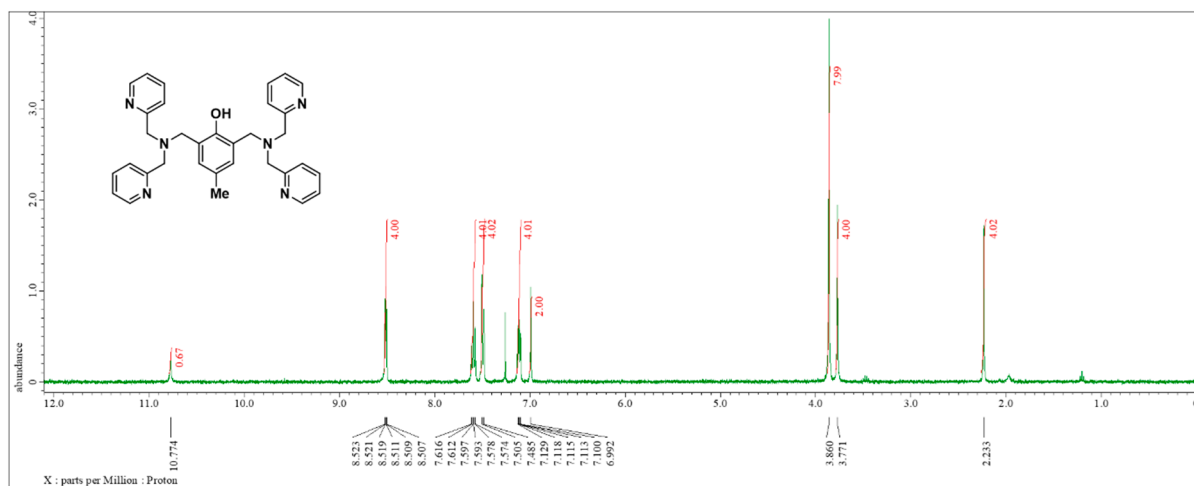

**Figure S2.** <sup>1</sup>H-NMR spectrum of H-BPMP.

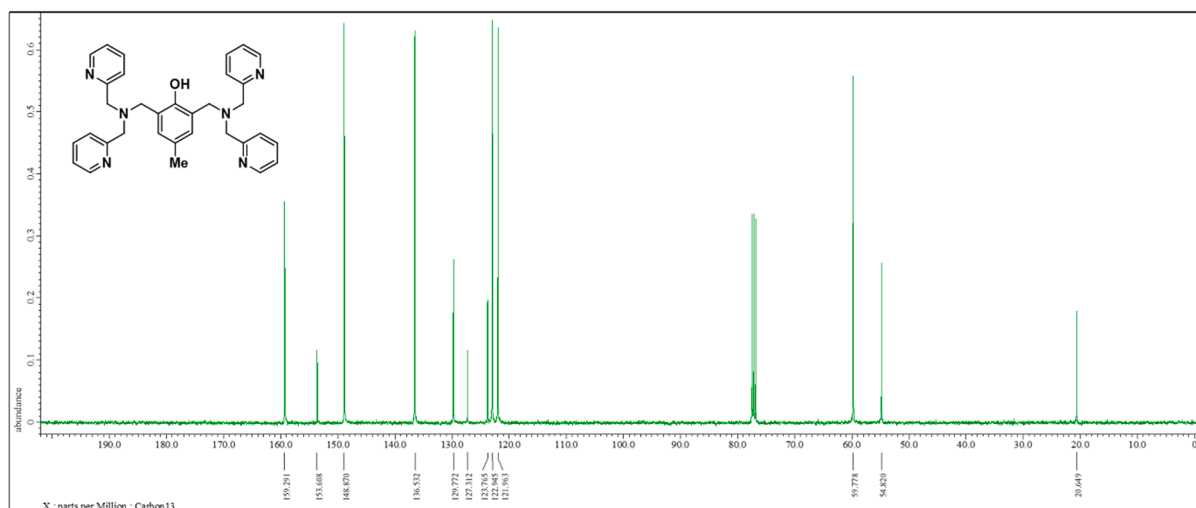

Figure S3.  $^{13}\text{C}$ -NMR spectrum of H-BPMP.

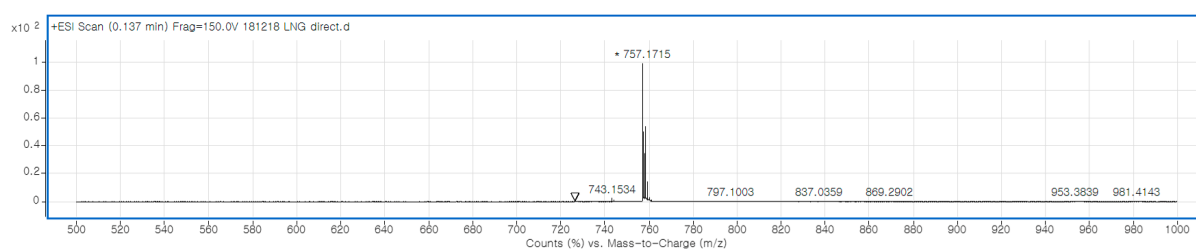

Figure S4. Mass spectrum of  $\text{Mn}_2\text{BPMP}$ .

#### Optimization of ADP Concentration in the $\text{Mn}_2\text{BPMP}/\text{ABTS}/\text{H}_2\text{O}_2$ System

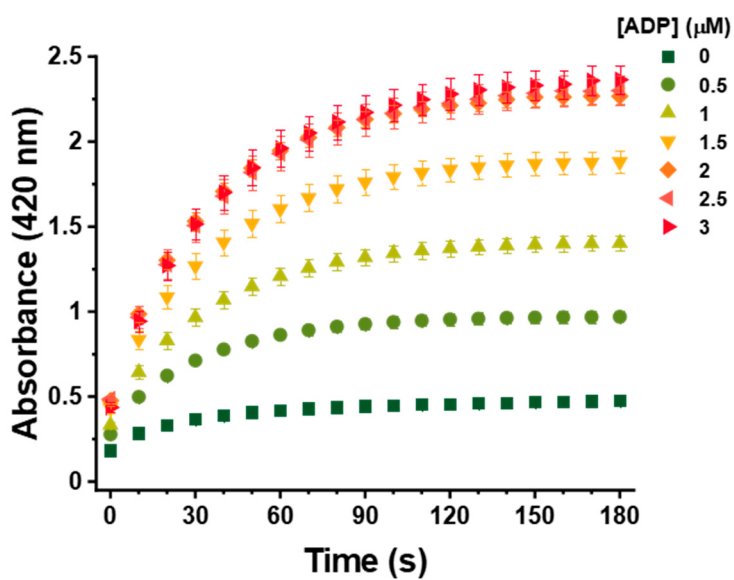

Figure S5. The plot of absorbance at 420 nm versus the time with different concentrations of ADP from 0 to 3  $\mu\text{M}$ .  $\text{Mn}_2\text{BPMP}$  = 1  $\mu\text{M}$ , ABTS = 1 mM, and  $\text{H}_2\text{O}_2$  = 5 mM in a buffer solution (Tris, 20 mM, pH 7.0).

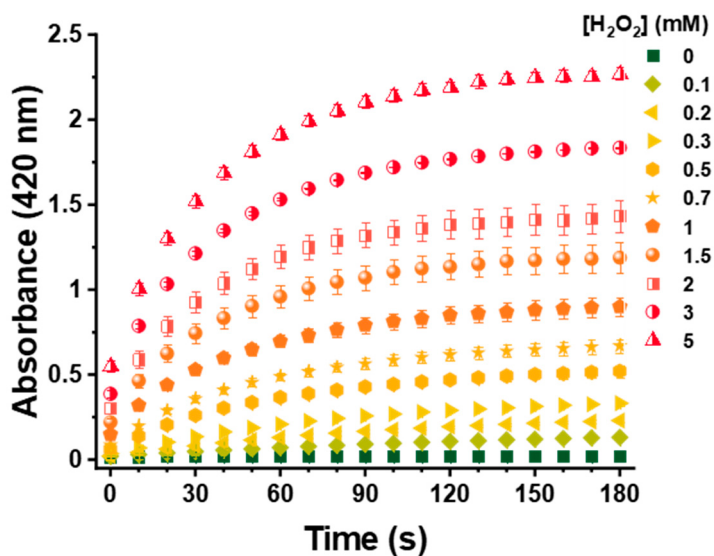

**Figure S6.** The plot of absorbance at 420 nm versus the time with different concentrations of H<sub>2</sub>O<sub>2</sub> from 0 to 5 mM. Mn<sub>2</sub>BPMP = 1  $\mu$ M, ADP = 2  $\mu$ M, and ABTS = 1 mM in a buffer solution (Tris, 20 mM, pH 7.0).

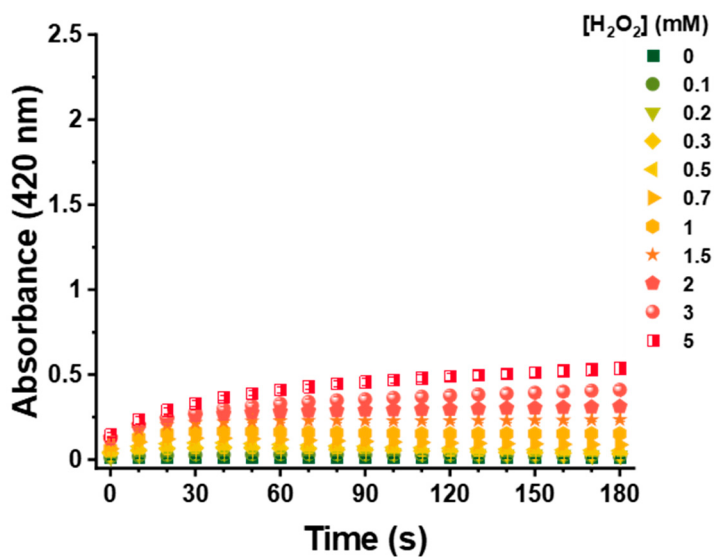

**Figure S7.** The plot of absorbance at 420 nm versus the time with different concentrations of H<sub>2</sub>O<sub>2</sub> from 0 to 5 mM. Mn<sub>2</sub>BPMP = 1  $\mu$ M, and ABTS = 1 mM in a buffer solution (Tris, 20 mM, pH 7.0).

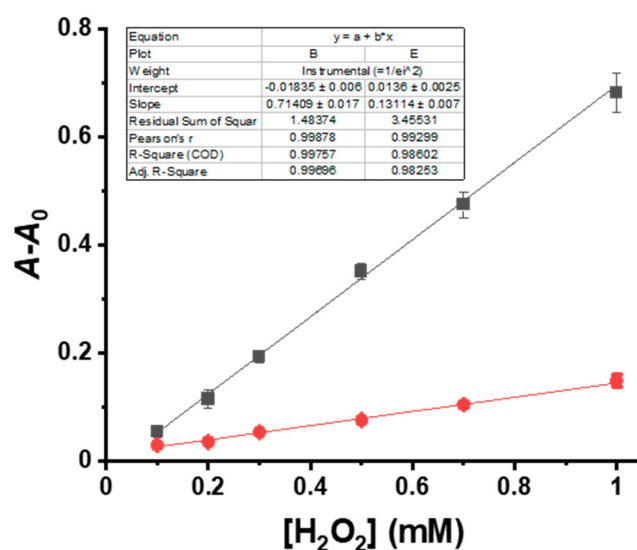

**Figure S8.** The plot of  $A-A_0$  at 420 nm versus the concentration of  $H_2O_2$  after 1 min in the presence (black line) or absence (red line) of ADP (2  $\mu$ M).  $Mn_2BPMP = 1 \mu$ M, and  $ABTS = 1$  mM in a buffer solution (Tris, 20 mM, pH 7.0). The LOD was 9.7  $\mu$ M with  $\sigma = 2.3 \times 10^{-3}$  and  $k = 7.1 \times 10^{-1} \text{ mM}^{-1}$  in the presence of ADP, and The LOD was 85  $\mu$ M with  $\sigma = 3.7 \times 10^{-3}$ , and  $k = 1.3 \times 10^{-1} \text{ mM}^{-1}$  in the absence of ADP.

#### *Glucose Titration Using the $Mn_2BPMP/ABTS/GOx$ System in the Presence or Absence of ADP*

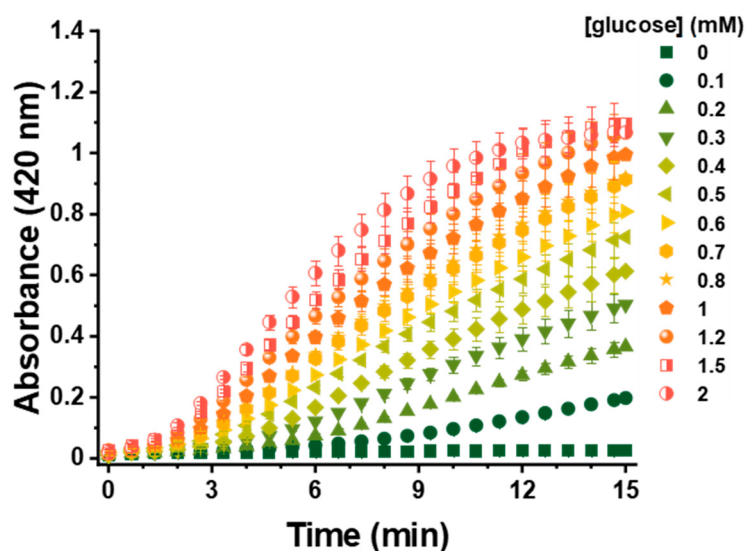

**Figure S9.** The plot of absorbance at 420 nm versus the time with different concentrations of glucose from 0 to 5 mM.  $Mn_2BPMP = 2 \mu$ M,  $ADP = 4 \mu$ M,  $ABTS = 1$  mM, and  $GOx = 1$  U/mL in a buffer solution (Tris, 20 mM, pH 7.0).

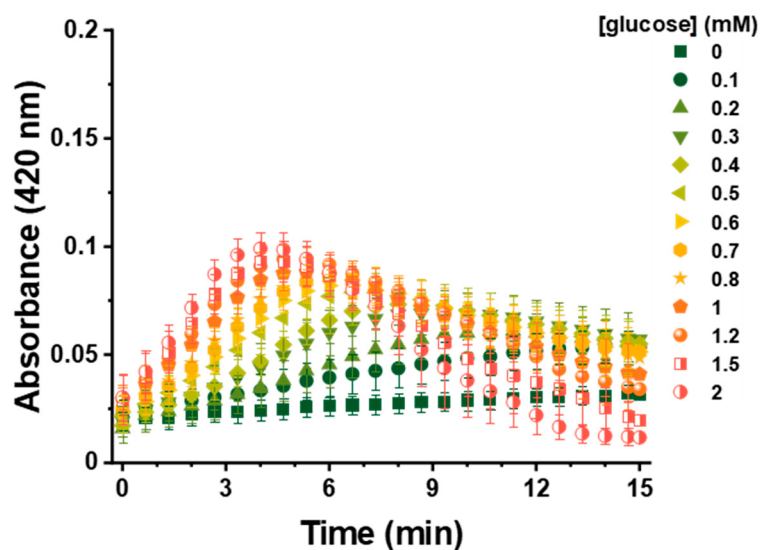

**Figure S10.** The plot of absorbance at 420 nm versus the time with different concentrations of glucose from 0 to 5 mM.  $\text{Mn}_2\text{BPMP} = 2 \mu\text{M}$ ,  $\text{ABTS} = 1 \text{ mM}$ , and  $\text{GOx} = 1 \text{ U/mL}$  in a buffer solution (Tris, 20 mM, pH 7.0).

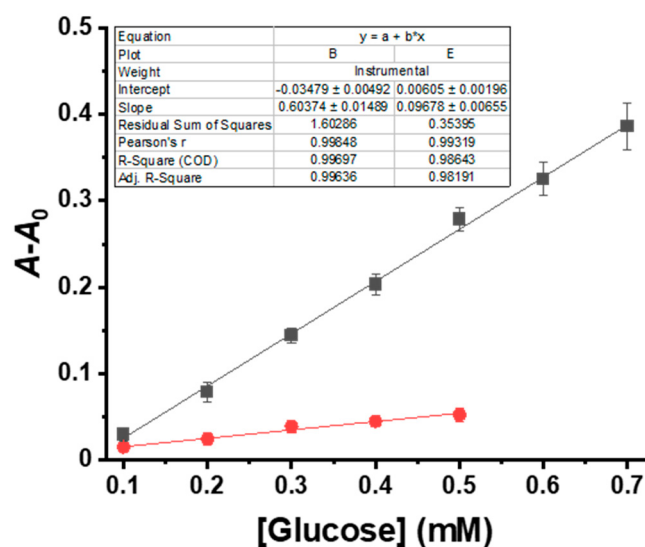

**Figure S11.** The plot of  $A-A_0$  at 420 nm versus the concentration of glucose after 7 min in the presence (black line) or absence (red line) of ADP ( $4 \mu\text{M}$ ).  $\text{Mn}_2\text{BPMP} = 2 \mu\text{M}$ ,  $\text{ABTS} = 1 \text{ mM}$ , and  $\text{GOx} = 1 \text{ U/mL}$  in a buffer solution (Tris, 20 mM, pH 7.0). The LOD was  $16 \mu\text{M}$  with  $\sigma = 3.2 \times 10^{-3}$  and  $k = 6.0 \times 10^{-1} \text{ mM}^{-1}$  in the presence of ADP, and The LOD was  $59 \mu\text{M}$  with  $\sigma = 1.9 \times 10^{-3}$ , and  $k = 9.7 \times 10^{-2} \text{ mM}^{-1}$  in the absence of ADP.

*Comparison of ADP/Mn<sub>2</sub>BPMP/ABTS/AOx System with Previous Peroxidase-Based Enzyme Cascade Assay Methods*

**Table S1.** Pros and cons of the ADP/Mn<sub>2</sub>BPMP/ABTS/AOx system compared to the previous peroxidase-based enzyme cascade assay methods.

|                                       | HRP-Based Enzyme Cascade Assay Method                               | Peroxidase-Mimics-Based Enzyme Cascade Assay Method                                                                               | This Method                                                                                                                        |
|---------------------------------------|---------------------------------------------------------------------|-----------------------------------------------------------------------------------------------------------------------------------|------------------------------------------------------------------------------------------------------------------------------------|
| <b>Peroxidases</b>                    | Horseradish peroxidase (HRP; Natural enzyme)                        | Magnetic nanoparticles, gold nanoparticles, metal – organic frameworks, and etc.<br>(Mainly nanomaterial-based peroxidase-mimics) | Mn <sub>2</sub> BPMP<br>(Small molecule-based peroxidase mimic)                                                                    |
| <b>Characteristics of peroxidases</b> | Workable at neutral pH<br>High catalytic activity                   | Workable at acidic pH (mainly pH 4)<br>Poor batch to batch variation                                                              | Workable at neutral pH<br>Easy chemical modification<br>Great reproducibility                                                      |
| <b>Pros</b>                           | One-pot assay system<br>Rapid detection time                        | High stability<br>Cost-effective                                                                                                  | Improved sensitivity by simple addition of ADP<br>One-pot assay system<br>High stability<br>Rapid detection time<br>Cost-effective |
| <b>Cons</b>                           | High preparation cost<br>Low stability for environmental conditions | Multiple step assay (pH adjustment required; e.g. pH 7 to pH 4)<br>Long detection times.                                          | Relatively low activity compared to HRP                                                                                            |

*Serum Glucose Assay Using the ADP/Mn<sub>2</sub>BPMP/ABTS/GOx System*

**Table S2.** Detection of glucose in human serum.

|             | Added (mM) | Actual Conc. (mM) | Found (mM) | Recovery (%) | RSD (%) |
|-------------|------------|-------------------|------------|--------------|---------|
| Human serum | 5.00       | 10.35             | 9.45       | 91.34        | 5.26    |
|             | 10.00      | 15.35             | 12.71      | 82.79        | 8.80    |
|             | 25.00      | 30.35             | 30.40      | 100.16       | 9.12    |

*Cholesterol Titration Using the Mn<sub>2</sub>BPMP/ABTS/ChOx System in the Presence or Absence of ADP*

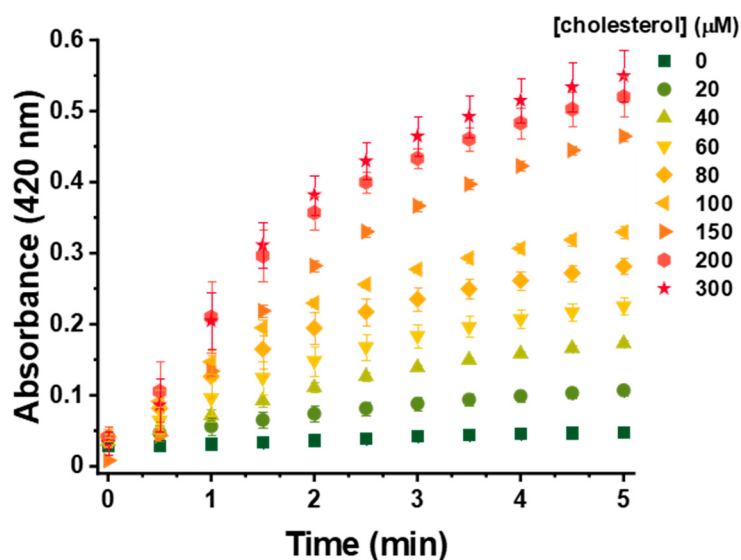

**Figure S12.** The plot of absorbance at 420 nm versus the time with different concentrations of cholesterol from 0 to 300  $\mu\text{M}$ . Mn<sub>2</sub>BPMP = 2  $\mu\text{M}$ , ADP = 4  $\mu\text{M}$ , ABTS = 1 mM, and ChOx = 1 U/mL in a buffer solution (Tris, 20 mM, pH 7.0).

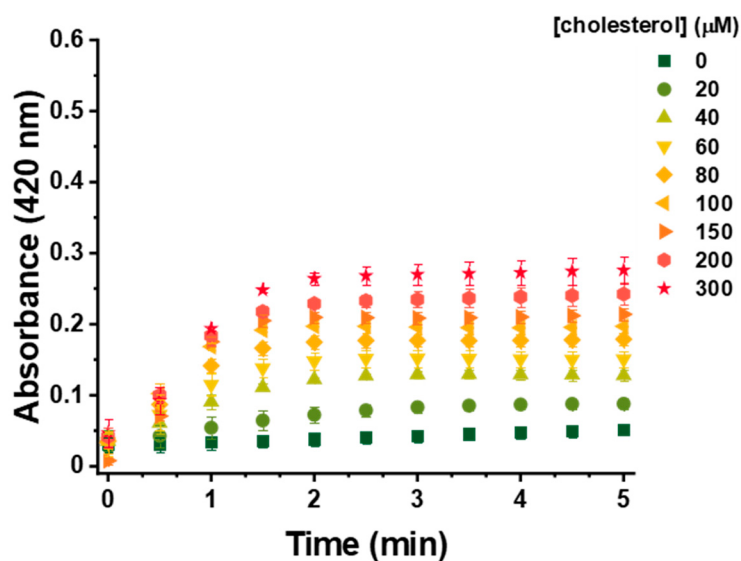

**Figure S13.** The plot of absorbance at 420 nm versus the time with different concentrations of cholesterol from 0 to 300  $\mu\text{M}$ . Mn<sub>2</sub>BPMP = 2  $\mu\text{M}$ , ABTS = 1 mM, and ChOx = 1 U/mL in a buffer solution (Tris, 20 mM, pH 7.0).

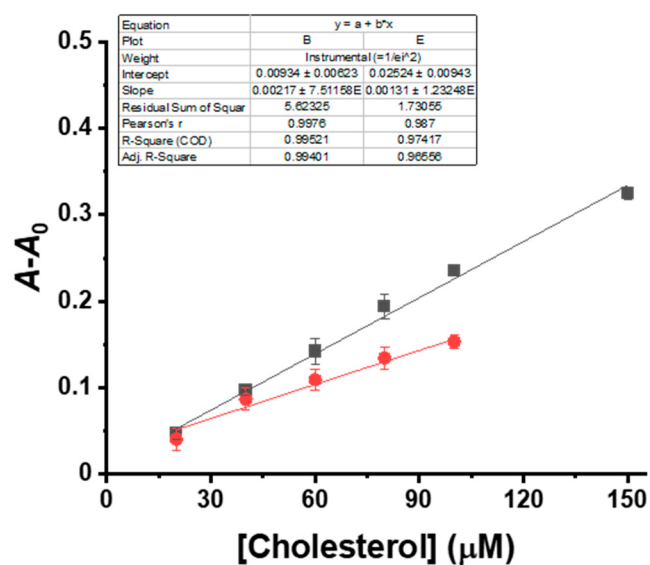

**Figure S14.** The plot of  $A-A_0$  at 420 nm versus the concentration of cholesterol after 3 min in the presence (black line) or absence (red line) of ADP (4  $\mu\text{M}$ ).  $\text{Mn}_2\text{BPMP}$  = 2  $\mu\text{M}$ ,  $\text{ABTS}$  = 1 mM, and  $\text{ChOx}$  = 1 U/mL in a buffer solution (Tris, 20 mM, pH 7.0). The LOD was 4.8  $\mu\text{M}$  with  $\sigma = 3.5 \times 10^{-3}$  and  $k = 2.2 \text{ mM}^{-1}$  in the presence of ADP, and The LOD was 12  $\mu\text{M}$  with  $\sigma = 5.1 \times 10^{-3}$ , and  $k = 1.3 \text{ mM}^{-1}$  in the absence of ADP.

## References

1. Lee, Y.; Yoo, S.; Kang, S.; Hong, S.; Han, M.S. An  $[\text{Mn}_2(\text{bpmp})]^{3+}$  complex as an artificial peroxidase and its applications in colorimetric pyrophosphate sensing and cascade-type pyrophosphatase assay. *Analyst* **2018**, *143*, 1780–1785.
